# Supplementary material for: Fasting triglycerides are positively associated with cardiovascular mortality risk in people with diabetes
Source: PubMed Central journal article supplement (PMC10153411; doi:10.1093/cvr/cvac124), 2022-07-29
Supplement: cvac124_supplementary_data.pdf [file cvac124_supplementary_data.pdf]

1 **Supplemental Material**

2  
3  
4 **Fasting triglycerides are positively associated with cardiovascular mortality risk in**  
5 **people with diabetes**

6  
7 **Short title:** Triglycerides and CVD mortality

8 **Authors:** Yutang Wang,<sup>1,#</sup> Yan Fang,<sup>1</sup> Dianna J. Magliano,<sup>2</sup> Fadi J. Charchar,<sup>1</sup> Christopher G.  
9 Sobey,<sup>3</sup> Grant R. Drummond,<sup>3</sup> Jonathan Golledge<sup>4,5</sup>

10  
11 <sup>1</sup>Discipline of Life Science, School of Science, Psychology and Sport, Federation University  
12 Australia, Ballarat, VIC, 3350, Australia.

13 <sup>2</sup>Diabetes and Population Health, Baker Heart and Diabetes Institute, Melbourne, VIC,  
14 Australia

15 <sup>3</sup>Centre for Cardiovascular Biology and Disease Research and Department of Microbiology,  
16 Anatomy, Physiology & Pharmacology, School of Agriculture, Biomedicine & Environment,  
17 La Trobe University, Melbourne, VIC, Australia

18 <sup>4</sup>Queensland Research Centre for Peripheral Vascular Disease, College of Medicine and  
19 Dentistry, James Cook University, Townsville, QLD, Australia

20 <sup>5</sup>Department of Vascular and Endovascular Surgery, The Townsville University Hospital,  
21 Townsville, QLD, Australia

22  
23 **# Correspondence to:** Yutang Wang, Discipline of Life Science, School of Science,  
24 Psychology and Sport, Federation University Australia, University Drive, Mt Helen, VIC, 3350,  
25 Australia. Tel: 61-3-53279394; E-mail: yutang.wang@federation.edu.au

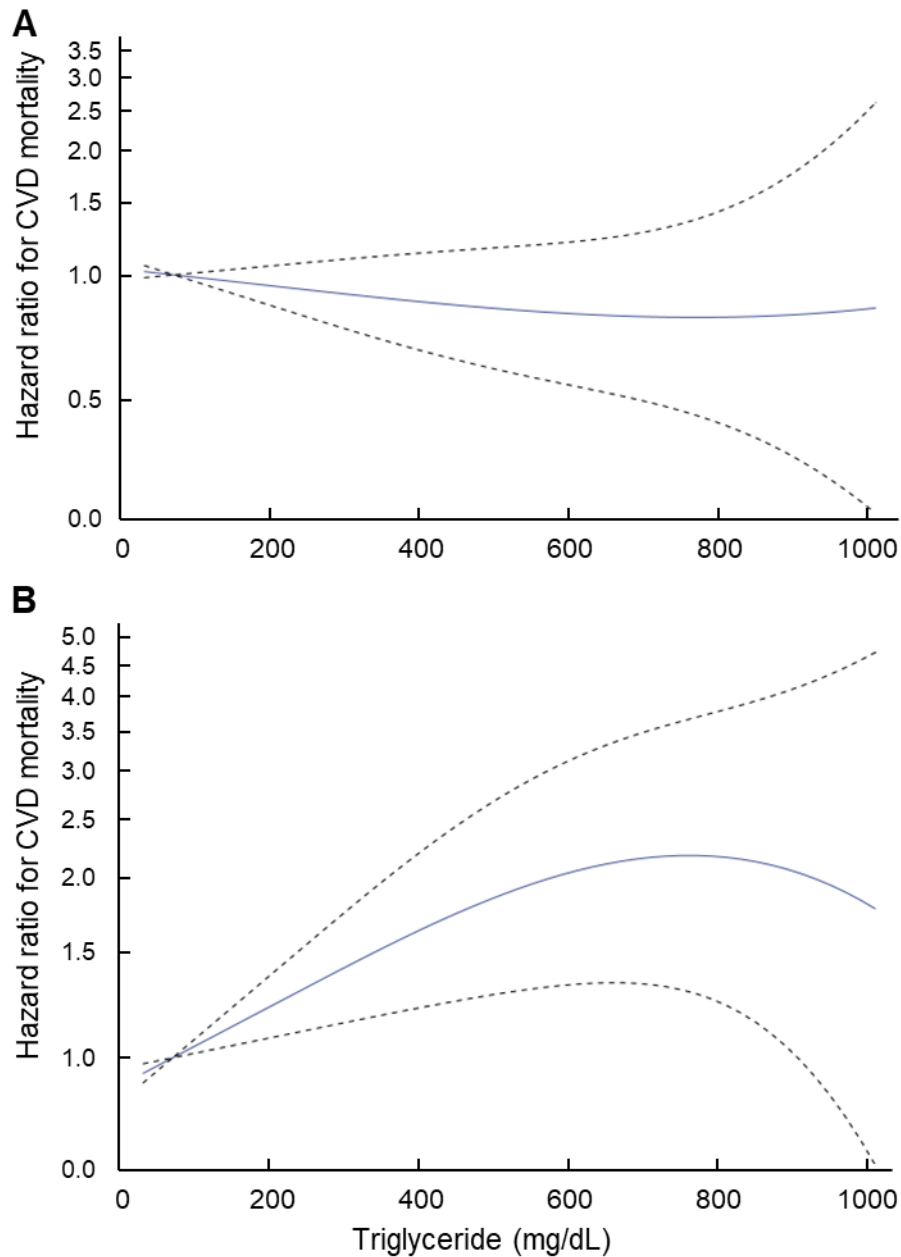

28

29 **Supplemental Figure 1.** Adjusted restricted cubic spline plots of triglycerides for CVD  
 30 mortality risks. **A**, Participants without diabetes. **B**, Participants with diabetes ( $P=0.011$ , for  
 31 the non-linearity test). The analysis was adjusted for age, sex, ethnicity, obesity, poverty-  
 32 income ratio, education, physical activity, alcohol consumption, smoking status, survey period,  
 33 hypercholesterolemia, hypertension, family history of diabetes, duration of diabetes, and  
 34 diabetes medications. CVD, cardiovascular disease.

35

36

37 **Supplemental Table 1.** Recent 13 randomized controlled trials (RCTs) since 2010 on triglyceride-lowering therapies with cardiovascular outcomes as primary  
 38 endpoints

| Ref                   | Trial names         | Publication year | Patient population                                                                                  | Intervention                                  | Primary endpoint                                                                                               | Was primary endpoint achieved ? |
|-----------------------|---------------------|------------------|-----------------------------------------------------------------------------------------------------|-----------------------------------------------|----------------------------------------------------------------------------------------------------------------|---------------------------------|
| <i>Omega-3 trials</i> |                     |                  |                                                                                                     |                                               |                                                                                                                |                                 |
| 1                     | Omega               | 2010             | 3,851 patients with recent MI (3 to 14 days)                                                        | EPA + DHA vs. placebo                         | sudden cardiac death                                                                                           | No                              |
| 2                     | Alpha Omega         | 2010             | 4,837 patients with MI                                                                              | EPA +DHA, or alpha-linolenic acid vs. placebo | fatal and nonfatal CVD events or cardiac interventions                                                         | No                              |
| 3                     | SU.FOL.OM3          | 2010             | 2,501 patients with MI, unstable angina, or ischaemic stroke                                        | EPA + DHA vs. placebo                         | nonfatal MI, stroke, or CVD death                                                                              | No                              |
| 4                     | ORIGIN              | 2012             | 12,536 patients with dysglycemia and high CVD risk                                                  | EPA + DHA vs. placebo                         | CVD death                                                                                                      | No                              |
| 5                     | Risk and Prevention | 2013             | 12,513 patients with multiple CVD risk factors                                                      | EPA + DHA vs. placebo                         | nonfatal MI or nonfatal stroke                                                                                 | No                              |
| 6                     | ASCEND              | 2018             | 15,480 patients with diabetes but without atherosclerotic CVD                                       | EPA + DHA vs. placebo                         | nonfatal MI, stroke, transient ischemic attack, or vascular death, excluding confirmed intracranial hemorrhage | No                              |
| 7                     | VITAL               | 2019             | 25,871 participants from a general population                                                       | EPA + DHA vs. placebo                         | major CVD events (MI, stroke, or CVD death), or invasive cancer                                                | No                              |
| 8                     | REDUCE-IT           | 2019             | 8,179 patients with hypertriglyceridemia (fasting triglyceride 135 to 499 mg/dL)<br>Diabetes: 58.5% | icosapent ethyl vs. placebo                   | CVD death, nonfatal MI, nonfatal stroke, coronary revascularization, or unstable angina                        | Yes                             |
| 9                     | STRENGTH            | 2020             | 13,078 patients with high CVD risk                                                                  | EPA + DHA vs. placebo                         | CVD death, MI, stroke, coronary                                                                                | No                              |

|                       |              |      |                                                   |                                  |                                                                                                                                                                                        |    |
|-----------------------|--------------|------|---------------------------------------------------|----------------------------------|----------------------------------------------------------------------------------------------------------------------------------------------------------------------------------------|----|
| 10                    | OMEMI        | 2021 | 1,027 elderly patients with recent MI (2-8 weeks) | EPA + DHA vs. placebo            | revascularization, or unstable angina requiring hospitalization<br>nonfatal MI, unscheduled revascularization, stroke, all-cause death, or heart failure hospitalization after 2 years | No |
| <i>Niacin trials</i>  |              |      |                                                   |                                  |                                                                                                                                                                                        |    |
| 11                    | AIM-HIGH     | 2011 | 3,414 patients with prior CVD                     | niacin vs. placebo               | CHD death, nonfatal MI, or ischemic stroke, etc                                                                                                                                        | No |
| 12                    | HPS2-THRIVE  | 2014 | 25,673 patients with prior CVD                    | niacin + laropiprant vs. placebo | nonfatal MI, cardiac death, stroke, or arterial revascularization                                                                                                                      | No |
| <i>Fibrate trials</i> |              |      |                                                   |                                  |                                                                                                                                                                                        |    |
| 13                    | ACCORD-Lipid | 2011 | 5,518 patients with type 2 diabetes               | fenofibrate vs. placebo          | fatal and nonfatal CHD, or stroke                                                                                                                                                      | No |

39 ACCORD, Action to Control Cardiovascular Risk in Diabetes; AIM-HIGH, Atherothrombosis Intervention in Metabolic Syndrome with Low HDL/High  
40 Triglycerides, Impact on Global Health Outcomes; Alpha Omega, Study of Omega-3 Fatty Acids and Coronary Mortality; ASCEND, A Study of Cardiovascular  
41 Events in Diabetes; BIP, Bezafibrate Infarction Prevention; CHD, coronary heart disease; CVD, cardiovascular disease; DHA, docosahexaenoic acid; EPA,  
42 eicosapentaenoic acid; FIELD, Fenofibrate Intervention and Event Lowering in Diabetes; HDL, high-density lipoprotein; HPS2-THRIVE, Heart Protection  
43 Study 2–Treatment of HDL to Reduce the Incidence of Vascular Events; MI, myocardial infarction; OMEGA, Effect of Omega 3-Fatty Acids on the Reduction  
44 of Sudden Cardiac Death After Myocardial Infarction; OMEMI, Omega-3 Fatty Acids in Elderly Patients With Myocardial Infarction; ORIGIN, Outcome  
45 Reduction with an Initial Glargine Intervention; ref, reference; REDUCE-IT, Reduction of Cardiovascular Events with Icosapent Ethyl–Intervention Trial;  
46 STRENGTH, Long-Term Outcomes Study to Assess Statin Residual Risk with Epanova in High Cardiovascular Risk Patients with Hypertriglyceridemia;  
47 SU.FOL.OM3, Supplémentation en Folates et Omega-3; VITAL, Vitamin D and Omega A3 Trial; vs., versus.

#### 48 **References**

- 49 1. Rauch B, Schiele R, Schneider S, Diller F, Victor N, Gohlke H, Gottwik M, Steinbeck G, Del Castillo U, Sack R, et al. OMEGA, a randomized, placebo-  
50 controlled trial to test the effect of highly purified omega-3 fatty acids on top of modern guideline-adjusted therapy after myocardial infarction. *Circulation*.  
51 2010;122:2152-9.
- 52 2. Kromhout D, Giltay EJ and Geleijnse JM. n–3 Fatty Acids and Cardiovascular Events after Myocardial Infarction. *New England Journal of Medicine*.  
53 2010;363:2015-2026.
- 54 3. Galan P, Kesse-Guyot E, Czernichow S, Briancon S, Blacher J and Hercberg S. Effects of B vitamins and omega 3 fatty acids on cardiovascular diseases:  
55 a randomised placebo controlled trial. *BMJ*. 2010;341:c6273.
- 56 4. The ORIGIN Trial Investigators. n–3 Fatty Acids and Cardiovascular Outcomes in Patients with Dysglycemia. *New England Journal of Medicine*.  
57 2012;367:309-318.

- 58 5. Roncaglioni MC, Tombesi M, Avanzini F, Barlera S, Caimi V, Longoni P, Marzona I, Milani V, Silletta MG, Tognoni G, et al. n-3 fatty acids in patients  
59 with multiple cardiovascular risk factors. *N Engl J Med.* 2013;368:1800-8.
- 60 6. The ASCEND Study Collaborative Group. Effects of n-3 Fatty Acid Supplements in Diabetes Mellitus. *New England Journal of Medicine.* 2018;379:1540-  
61 1550.
- 62 7. Manson JE, Cook NR, Lee IM, Christen W, Bassuk SS, Mora S, Gibson H, Albert CM, Gordon D, Copeland T, et al. Marine n-3 Fatty Acids and Prevention  
63 of Cardiovascular Disease and Cancer. *N Engl J Med.* 2019;380:23-32.
- 64 8. Bhatt DL, Steg PG, Miller M, Brinton EA, Jacobson TA, Ketchum SB, Doyle RT, Jr., Juliano RA, Jiao L, Granowitz C, et al. Cardiovascular Risk Reduction  
65 with Icosapent Ethyl for Hypertriglyceridemia. *N Engl J Med.* 2019;380:11-22.
- 66 9. Nicholls SJ, Lincoff AM, Garcia M, Bash D, Ballantyne CM, Barter PJ, Davidson MH, Kastelein JJP, Koenig W, McGuire DK, et al. Effect of High-Dose  
67 Omega-3 Fatty Acids vs Corn Oil on Major Adverse Cardiovascular Events in Patients at High Cardiovascular Risk: The STRENGTH Randomized Clinical  
68 Trial. *Jama.* 2020;324:2268-2280.
- 69 10. Kalstad AA, Myhre PL, Laake K, Tveit SH, Schmidt EB, Smith P, Nilsen DWT, Tveit A, Fagerland MW, Solheim S, et al. Effects of n-3 Fatty Acid  
70 Supplements in Elderly Patients After Myocardial Infarction. *Circulation.* 2021;143:528-539.
- 71 11. The AIM-HIGH Investigators. Niacin in Patients with Low HDL Cholesterol Levels Receiving Intensive Statin Therapy. *New England Journal of Medicine.*  
72 2011;365:2255-2267.
- 73 12. The HPS2-THRIVE Collaborative Group. Effects of Extended-Release Niacin with Laropiprant in High-Risk Patients. *New England Journal of Medicine.*  
74 2014;371:203-212.
- 75 13. Elam M, Lovato L and Ginsberg H. The ACCORD-Lipid study: implications for treatment of dyslipidemia in Type 2 diabetes mellitus. *Clin Lipidol.*  
76 2011;6:9-20  
77

78

79 **Supplemental Table 2.** Interaction of diabetes with triglyceride for CVD mortality risks

|                   | HR * | 95% CI    | <i>P</i> value |
|-------------------|------|-----------|----------------|
| LnTG X diabetes † | 1.30 | 1.05-1.61 | 0.015          |

80 Abbreviations: CI, confidence interval; HR, hazard ratio; LnTG, natural log-transformed  
81 triglycerides.

82 \* Adjusted for age, sex, ethnicity, obesity, poverty-income ratio, education, physical activity,  
83 alcohol consumption, smoking status, survey period, hypercholesterolemia, hypertension,  
84 family history of diabetes, duration of diabetes, diabetes medications, diabetes, and natural log-  
85 transformed triglycerides (LnTG).

86 † The interaction factor, computed as natural log-transformed triglycerides multiplied by  
87 diabetes (yes and no, coded as 1 and 0, respectively). The resulting interaction factor was  
88 treated as a continuous variable in the interaction analysis.

89

90 **Supplemental Table 3.** Triglyceride (natural log-transformed) and risk for CVD mortality among  
 91 26,570 adults, stratified by LDL cholesterol  
 92

| LDL cholesterol (mg/dL)       | N      | HR * | 95% CI    | P value |
|-------------------------------|--------|------|-----------|---------|
| Participants without diabetes |        |      |           |         |
| ≤ 55                          | 368    | 0.70 | 0.14-3.61 | 0.668   |
| 55.1-70                       | 882    | 0.92 | 0.31-2.70 | 0.878   |
| 70.1-100                      | 4,769  | 0.82 | 0.57-1.18 | 0.293   |
| >100                          | 13,822 | 1.01 | 0.84-1.21 | 0.932   |
| Unknown (missing data)        | 2,751  | 0.91 | 0.71-1.16 | 0.438   |
| Participants with diabetes    |        |      |           |         |
| ≤ 55                          | 139    | 2.34 | 0-2.6E+15 | 0.722   |
| 55.1-70                       | 301    | 1.00 | 0.32-3.18 | 1.000   |
| 70.1-100                      | 946    | 2.06 | 1.02-4.15 | 0.044   |
| >100                          | 2,165  | 1.16 | 0.83-1.63 | 0.375   |
| Unknown (missing data)        | 427    | 1.27 | 0.92-1.76 | 0.144   |

93 Abbreviations: CI, confidence interval; CVD, cardiovascular disease; HR, hazard ratio; LDL,  
 94 low-density lipoprotein.

95 \* Adjusted for age, sex, ethnicity, obesity, poverty-income ratio, education, physical activity,  
 96 alcohol consumption, smoking status, survey period, hypercholesterolemia, hypertension,  
 97 family history of diabetes, duration of diabetes, and diabetes medications.

98

99  
 100  
 101  
 102

**Supplemental Table 4.** Sensitivity analysis of the association of LnTG with CVD mortality risk when diabetes was defined by era-specific fasting glucose levels \*

| Models                                   | HR   | 95% CI    | <i>P</i> value |
|------------------------------------------|------|-----------|----------------|
| All participants (N=26,515)              |      |           |                |
| Model 1                                  | 1.23 | 1.12-1.36 | <0.001         |
| Model 2                                  | 1.16 | 1.04-1.28 | 0.006          |
| Model 3                                  | 1.12 | 1.01-1.24 | 0.037          |
| Model 4                                  | 1.05 | 0.94-1.16 | 0.395          |
| Participants without diabetes (N=24,176) |      |           |                |
| Model 1                                  | 1.08 | 0.96-1.20 | 0.205          |
| Model 2                                  | 0.99 | 0.88-1.12 | 0.907          |
| Model 3                                  | 0.96 | 0.85-1.08 | 0.478          |
| Model 4                                  | 0.95 | 0.84-1.07 | 0.368          |
| Participants with diabetes (N=2,339)     |      |           |                |
| Model 1                                  | 1.55 | 1.25-1.92 | <0.001         |
| Model 2                                  | 1.41 | 1.13-1.77 | 0.003          |
| Model 3                                  | 1.38 | 1.10-1.72 | 0.006          |
| Model 4                                  | 1.41 | 1.12-1.77 | 0.003          |

103 Abbreviations: CI, confidence interval; CVD, cardiovascular disease; HR, hazard ratio; LnTG, natural  
 104 log-transformed triglycerides.

105 \* In this sensitivity analysis, diabetes was defined as glucose  $\geq$ 140 mg/dL for participants from  
 106 NHANES III (1988-1994) or  $\geq$ 126 mg/dL for participants from NHANES 1999-2014, due to the change  
 107 of diabetes diagnostic criteria by the American Diabetes Association in 1997. Fifty-five participants  
 108 were excluded due to lacking glucose data and 26,515 participants were included in the sensitivity  
 109 analysis.

110 Model 1: adjusted for age, sex, and ethnicity; Model 2: adjusted for age, sex, ethnicity, obesity, poverty-  
 111 income ratio, education, physical activity, alcohol consumption, smoking status, and survey period;  
 112 Model 3: adjusted for all the factors in Model 2 plus hypercholesterolemia and hypertension; Model 4:  
 113 adjusted for all the factors in Model 3 plus diabetes, family history of diabetes, duration of diabetes,  
 114 and diabetes medications.  
 115



116 **Supplemental Table 5.** Sensitivity analysis of the association of LnTG with CVD mortality risk when  
 117 diabetes was defined as fasting glucose levels  $\geq 126$  mg/dL \*

| Models                                   | HR   | 95% CI    | P value |
|------------------------------------------|------|-----------|---------|
| All participants (N=26,515)              |      |           |         |
| Model 1                                  | 1.24 | 1.12-1.36 | <0.001  |
| Model 2                                  | 1.16 | 1.05-1.28 | 0.005   |
| Model 3                                  | 1.12 | 1.01-1.24 | 0.033   |
| Model 4                                  | 1.05 | 0.94-1.16 | 0.414   |
| Participants without diabetes (N=23,986) |      |           |         |
| Model 1                                  | 1.04 | 0.93-1.17 | 0.476   |
| Model 2                                  | 0.96 | 0.86-1.09 | 0.549   |
| Model 3                                  | 0.93 | 0.83-1.05 | 0.254   |
| Model 4                                  | 0.93 | 0.82-1.05 | 0.216   |
| Participants with diabetes (N=2,529)     |      |           |         |
| Model 1                                  | 1.55 | 1.26-1.89 | <0.001  |
| Model 2                                  | 1.44 | 1.16-1.77 | 0.001   |
| Model 3                                  | 1.40 | 1.13-1.73 | 0.002   |
| Model 4                                  | 1.43 | 1.16-1.78 | 0.001   |

118 Abbreviations: CI, confidence interval; CVD, cardiovascular disease; HR, hazard ratio; LnTG, natural  
 119 log-transformed triglyceride

120 \* In this sensitivity analysis, diabetes was defined as fasting plasma glucose  $\geq 126$  mg/dL for all  
 121 participants. Fifty-five participants were excluded due to lacking glucose data and 26,515 participants  
 122 were included in the sensitivity analysis.

123 Model 1: adjusted for age, sex, and ethnicity; Model 2: adjusted for age, sex, ethnicity, obesity, poverty-  
 124 income ratio, education, physical activity, alcohol consumption, smoking status, and survey period;  
 125 Model 3: adjusted for all the factors in Model 2 plus hypercholesterolemia and hypertension; Model 4:  
 126 adjusted for all the factors in Model 3 plus diabetes, family history of diabetes, duration of diabetes,  
 127 and diabetes medications.  
 128

129 **Supplemental Table 6.** Sensitivity analysis of the association of LnTG with CVD mortality risk  
 130 among 26,570 adults after further adjustment for the use of lipid-lowering medications  
 131

| Models                                   | HR   | 95% CI    | <i>P</i> value |
|------------------------------------------|------|-----------|----------------|
| All participants (N=26,570)              |      |           |                |
| Model 1                                  | 1.06 | 0.95-1.17 | 0.315          |
| Model 2                                  | 1.06 | 0.95-1.17 | 0.296          |
| Participants without diabetes (N=22,592) |      |           |                |
| Model 1                                  | 0.95 | 0.83-1.07 | 0.382          |
| Model 2                                  | 0.95 | 0.83-1.08 | 0.404          |
| Participants with diabetes (N=3,978)     |      |           |                |
| Model 1                                  | 1.30 | 1.08-1.56 | 0.006          |
| Model 2                                  | 1.30 | 1.08-1.57 | 0.006          |

132 Abbreviations: CI, confidence interval; CVD, cardiovascular disease; HR, hazard ratio; LnTG, natural  
 133 log-transformed triglycerides.

134 Model 1: adjusted for age, sex, ethnicity, obesity, poverty-income ratio, education, physical activity,  
 135 alcohol consumption, smoking status, survey period, hypercholesterolemia, hypertension, diabetes,  
 136 family history of diabetes, duration of diabetes, and diabetes medications.

137 Model 2: adjusted for all the factors in Model 1 plus the use of lipid-lowering medications (yes, no, or  
 138 unknown).

139

140

141 **Supplemental Table 7.** Sensitivity analysis of the association of LnTG with CVD mortality risk among  
 142 23,496 adults after exclusion of those using lipid-lowering medications \*  
 143

| Models                                   | HR   | 95% CI    | <i>P</i> value |
|------------------------------------------|------|-----------|----------------|
| All participants (N=23,496)              |      |           |                |
| Model 1                                  | 1.19 | 1.07-1.33 | 0.001          |
| Model 2                                  | 1.12 | 1.00-1.25 | 0.049          |
| Model 3                                  | 1.09 | 0.98-1.22 | 0.116          |
| Model 4                                  | 1.04 | 0.93-1.16 | 0.522          |
| Participants without diabetes (N=20,758) |      |           |                |
| Model 1                                  | 1.02 | 0.90-1.16 | 0.709          |
| Model 2                                  | 0.95 | 0.84-1.09 | 0.491          |
| Model 3                                  | 0.94 | 0.82-1.07 | 0.337          |
| Model 4                                  | 0.94 | 0.82-1.08 | 0.359          |
| Participants with diabetes (N=2,738)     |      |           |                |
| Model 1                                  | 1.38 | 1.12-1.68 | 0.002          |
| Model 2                                  | 1.28 | 1.04-1.58 | 0.020          |
| Model 3                                  | 1.26 | 1.02-1.56 | 0.033          |
| Model 4                                  | 1.32 | 1.06-1.64 | 0.013          |

144 Abbreviations: CI, confidence interval; CVD, cardiovascular disease; HR, hazard ratio; LnTG, natural  
 145 log-transformed triglycerides.

146 \* A total of 3,074 participants took lipid-lowering medications. After exclusion of those participants,  
 147 23,496 participants were included in the sensitivity analysis.

148 Model 1: adjusted for age, sex, and ethnicity; Model 2: adjusted for age, sex, ethnicity, obesity, poverty-  
 149 income ratio, education, physical activity, alcohol consumption, smoking status, and survey period;  
 150 Model 3: adjusted for all the factors in Model 2 plus hypercholesterolemia and hypertension; Model 4:  
 151 adjusted for all the factors in Model 3 plus diabetes, family history of diabetes, duration of diabetes,  
 152 and diabetes medications.

153

154

155 **Supplemental Table 8.** Sensitivity analysis of the association of LnTG with risk for CVD mortality  
 156 among 25,956 adults\* when the analysis was adjusted for systolic blood pressure (continuous) rather  
 157 than hypertension (categorical)

158

|                                          | HR <sup>†</sup> | 95% CI    | <i>P</i> value |
|------------------------------------------|-----------------|-----------|----------------|
| All participants (N=26,570)              | 1.03            | 0.93-1.14 | 0.594          |
| Participants without diabetes (N=22,592) | 0.91            | 0.80-1.04 | 0.168          |
| Participants with diabetes (N=3,978)     | 1.31            | 1.09-1.58 | 0.005          |

159 Abbreviations: CI, confidence interval; CVD, cardiovascular disease; HR, hazard ratio; LnTG, natural  
 160 log-transformed triglycerides.

161 \* A total of 614 participants did not have systolic blood pressure data. After exclusion of those  
 162 participants, the remaining 25,956 participants were included in the sensitivity analysis.

163 † Adjusted for age, sex, ethnicity, obesity, poverty-income ratio, education, physical activity, alcohol  
 164 consumption, smoking status, survey period, hypercholesterolemia, systolic blood pressure (natural log-  
 165 transformed), diabetes, family history of diabetes, duration of diabetes, and diabetes medications.

166

167

168

169 **Supplemental Table 9.** Sensitivity analysis of the association of LnTG with risk for CVD mortality  
 170 among 26,569 adults\* when the analysis was adjusted for total cholesterol (continuous) rather than  
 171 hypercholesterolemia (categorical)

172

| Models                                   | HR   | 95% CI    | <i>P</i> value |
|------------------------------------------|------|-----------|----------------|
| All participants (N=26,569)              |      |           |                |
| Model 1                                  | 1.06 | 0.95-1.17 | 0.315          |
| Model 2                                  | 1.04 | 0.93-1.16 | 0.520          |
| Participants without diabetes (N=22,591) |      |           |                |
| Model 1                                  | 0.95 | 0.83-1.07 | 0.381          |
| Model 2                                  | 0.94 | 0.82-1.08 | 0.390          |
| Participants with diabetes (N=3,978)     |      |           |                |
| Model 1                                  | 1.30 | 1.08-1.56 | 0.006          |
| Model 2                                  | 1.24 | 1.02-1.52 | 0.033          |

173 Abbreviations: CI, confidence interval; CVD, cardiovascular disease; HR, hazard ratio; LnTG, natural  
 174 log-transformed triglycerides.

175 \* One participant did not have total cholesterol data. After exclusion of that participant, the remaining  
 176 26,569 participants were included in the sensitivity analysis.

177 Model 1: adjusted for age, sex, ethnicity, obesity, poverty-income ratio, education, physical activity,  
 178 alcohol consumption, smoking status, survey period, hypertension, diabetes, family history of diabetes,  
 179 duration of diabetes, diabetes medications, and hypercholesterolemia.

180 Model 2: adjusted for all the factors in Model 1 except that hypercholesterolemia was replaced by total  
 181 cholesterol (natural log-transformed).

182

183

184 **Supplemental Table 10.** Sensitivity analysis of the association of LnTG with risk for CVD mortality  
 185 among 26,527 adults\* when the analysis was adjusted for HDL-cholesterol (continuous) rather than  
 186 hypercholesterolemia (categorical)

187

| Models                                   | HR   | 95% CI    | <i>P</i> value |
|------------------------------------------|------|-----------|----------------|
| All participants (N=26,527)              |      |           |                |
| Model 1                                  | 1.06 | 0.95-1.18 | 0.298          |
| Model 2                                  | 1.06 | 0.94-1.19 | 0.341          |
| Participants without diabetes (N=22,564) |      |           |                |
| Model 1                                  | 0.95 | 0.84-1.08 | 0.425          |
| Model 2                                  | 0.95 | 0.83-1.10 | 0.483          |
| Participants with diabetes (N=3,963)     |      |           |                |
| Model 1                                  | 1.30 | 1.08-1.58 | 0.006          |
| Model 2                                  | 1.32 | 1.07-1.63 | 0.011          |

188 Abbreviations: CI, confidence interval; CVD, cardiovascular disease; HDL, high-density lipoprotein;  
 189 HR, hazard ratio; LnTG, natural log-transformed triglycerides.

190 \*A total of 43 participants did not have HDL cholesterol data. After exclusion of these participants, the  
 191 remaining 26,527 participants were included in the sensitivity analysis.

192 Model 1: adjusted for age, sex, ethnicity, obesity, poverty-income ratio, education, physical activity,  
 193 alcohol consumption, smoking status, survey period, hypertension, diabetes, family history of diabetes,  
 194 duration of diabetes, diabetes medications, and hypercholesterolemia.

195 Model 2: adjusted for all the factors in Model 1 except that hypercholesterolemia was replaced by HDL  
 196 cholesterol (natural log-transformed).

197

198 **Supplemental Table 11.** Sensitivity analysis of the association of LnTG with risk for CVD mortality  
 199 among 26,526 adults\* when the analysis was adjusted for non-HDL cholesterol (continuous) rather than  
 200 hypercholesterolemia (categorical)

201

| Models                                   | HR   | 95% CI    | <i>P</i> value |
|------------------------------------------|------|-----------|----------------|
| All participants (N=26,526)              |      |           |                |
| Model 1                                  | 1.06 | 0.95-1.18 | 0.299          |
| Model 2                                  | 1.04 | 0.92-1.17 | 0.530          |
| Participants without diabetes (N=22,563) |      |           |                |
| Model 1                                  | 0.95 | 0.84-1.08 | 0.425          |
| Model 2                                  | 0.95 | 0.83-1.10 | 0.493          |
| Participants with diabetes (N=3,963)     |      |           |                |
| Model 1                                  | 1.30 | 1.08-1.58 | 0.006          |
| Model 2                                  | 1.25 | 1.00-1.55 | 0.049          |

202 Abbreviations: CI, confidence interval; CVD, cardiovascular disease; HDL, high-density lipoprotein;  
 203 HR, hazard ratio; LnTG, natural log-transformed triglycerides.

204 \*A total of 44 participants did not have non-HDL cholesterol data. After exclusion of these 44  
 205 participants, the remaining 26,526 participants were included in the sensitivity analysis.

206 Model 1: adjusted for age, sex, ethnicity, obesity, poverty-income ratio, education, physical activity,  
 207 alcohol consumption, smoking status, survey period, hypertension, diabetes, family history of diabetes,  
 208 duration of diabetes, diabetes medications, and hypercholesterolemia.

209 Model 2: adjusted for all the factors in Model 1 except that hypercholesterolemia was replaced by non-  
 210 HDL cholesterol (natural log-transformed).

211

212 **Supplemental Table 12.** Diabetes prevalence and triglyceride requirement in the recent 13 randomized  
 213 controlled trials investigating the effect of triglyceride-lowering therapies on CVD  
 214

| Reference             | Trial names         | Diabetes prevalence | Is high triglyceride an inclusion criterion? |
|-----------------------|---------------------|---------------------|----------------------------------------------|
| <i>Omega-3 trials</i> |                     |                     |                                              |
| 1                     | Omega               | 27%                 | No                                           |
| 2                     | Alpha Omega         | 21%                 | No                                           |
| 3                     | SU.FOL.OM3          | unknown             | No                                           |
| 4                     | ORIGIN              | <50%                | No                                           |
| 5                     | Risk and Prevention | 60%                 | No                                           |
| 6                     | ASCEND              | 100%                | No, triglyceride was not measured            |
| 7                     | VITAL               | 13.7%               | No                                           |
| 8                     | REDUCE-IT           | 58.5%               | Yes, 135-499 mg/dL                           |
| 9                     | STRENGTH            | 70%                 | Yes, 180-500 mg/dL                           |
| 10                    | OMEMI               | 20.7%               | No                                           |
| <i>Niacin trials</i>  |                     |                     |                                              |
| 11                    | AIM-HIGH            | 33.9%               | Yes, 150-400 mg/dL                           |
| 12                    | HPS2-THRIVE         | 32.3%               | No                                           |
| <i>Fibrate trials</i> |                     |                     |                                              |
| 13                    | ACCORD-Lipid        | 100%                | No                                           |

215  
 216 See Supplemental Table 1 for abbreviations and the reference for each trial.  
 217



**Supplemental Table 13.** Current and future trials on omega-3 and cardiovascular disease (CVD)

| No. | Trial identifier | Trial name                                                                                                                                                             | Trial status           | Is diabetes an inclusion criterion? | Is high triglyceride an inclusion criterion? | Intervention                                 |
|-----|------------------|------------------------------------------------------------------------------------------------------------------------------------------------------------------------|------------------------|-------------------------------------|----------------------------------------------|----------------------------------------------|
| 1   | NCT01343342      | Genes, Omega-3 Fatty Acids and Cardiovascular Disease Risk Factors (FAS)                                                                                               | Active, not recruiting | No                                  | No                                           | n-3 PUFA supplementation                     |
| 2   | NCT02178410      | VITAL Rhythm Study                                                                                                                                                     | Active, not recruiting | No                                  | No                                           | Omega-3 fatty acids (fish oil) or vitamin D3 |
| 3   | NCT01630213      | Impact of Vitamin D Supplementation on Cardiac Structure and Function                                                                                                  | Active, not recruiting | No                                  | No                                           | Vitamin D3 + fish oil                        |
| 4   | NCT01785004      | Vitamin D and Omega-3 Adiposity Trial (VITAL Adiposity)                                                                                                                | Active, not recruiting | No                                  | No                                           | Omega-3 fatty acids (fish oil) or vitamin D3 |
| 5   | NCT01653678      | Vitamin D and Omega-3 Hypertension Trial (VITAL Hypertension)                                                                                                          | Active, not recruiting | No                                  | No                                           | Omega-3 fatty acids (fish oil) or vitamin D3 |
| 6   | NCT02757872      | Effects of Vitamin D and Fish Oil on the Kidney in Hypertensives                                                                                                       | Active, not recruiting | No, diabetes was excluded           | No                                           | Omega-3 fatty acids (fish oil) or vitamin D3 |
| 7   | NCT03192410      | Prospective Cohort Study of 4,837 Post-myocardial Infarction Patients (Alpha Omega Cohort)                                                                             | Active, not recruiting | No                                  | No                                           | Dietary intake                               |
| 8   | NCT01953705      | n-3 PUFA for Vascular Cognitive Aging                                                                                                                                  | Active, not recruiting | No                                  | No                                           | Omega-3 PUFA                                 |
| 9   | NCT04658433      | The Effect of Omega -3 Supplements on the Serum Levels of ACE/ACE2 Ratio as a Potential Key in Cardiovascular Disease and COVID-19; A Randomized Clinical Trial in the | Recruiting             | No                                  | No                                           | Omega-3 fatty acids                          |

|    |             |                                                                                                                           |                    |                                      |     |                                                               |
|----|-------------|---------------------------------------------------------------------------------------------------------------------------|--------------------|--------------------------------------|-----|---------------------------------------------------------------|
|    |             | Covid-19 Uninfected Jordanian People                                                                                      |                    |                                      |     |                                                               |
| 10 | NCT04763291 | Cardiovascular and InflammAging Study                                                                                     | Recruiting         | No                                   | No  | Juice Plus+ Omega blend                                       |
| 11 | NCT04031508 | Effect of a Parenteral Emulsion With Omega3 on PPHN                                                                       | Recruiting         | No                                   | No  | Lipid injectable emulsion with fish oil                       |
| 12 | NCT04562467 | The Use of Icosapent Ethyl on Vascular Progenitor Cells in Individuals With Elevated Cardiovascular Risk                  | Recruiting         | Partially                            | Yes | Icosapent Ethyl 1000 mg oral capsule                          |
| 13 | NCT03576989 | Impact of Omega-3 Fatty Acid Oral Therapy on Healing of Chronic Venous Leg Ulcers in Older Adults                         | Recruiting         | No                                   | No  | EPA+DHA                                                       |
| 14 | NCT04499820 | Effect of OMEGA3 Supplementation in Diabetic Retinopathy                                                                  | Recruiting         | Yes                                  | No  | Omega-3 supplementation                                       |
| 15 | NCT04632407 | Can Flaxseed Prevent Broken Hearts in Women With Breast Cancer Study?                                                     | Recruiting         | No                                   | No  | Flax "milk"                                                   |
| 16 | NCT04120077 | Combined Effects of Diabetes Self-Management Education and Nutritional Supplementation on Visual Function and Retinopathy | Recruiting         | Partially, also includes prediabetes | No  | Multi-component formula or omega-3 fatty acid supplement      |
| 17 | NCT04496817 | Enriched Eggs for Retina Health in Type 2 Diabetes                                                                        | Not yet recruiting | Yes                                  | No  | Docosahexaenoic acid and lutein enriched eggs vs regular eggs |
| 18 | NCT04386525 | Omega 3 and Ischemic Stroke; Fish Oil as an Option (OmegaStroke)                                                          | Not yet recruiting | No                                   | No  | Omega-3 fish oil                                              |

220 Abbreviations: DHA, docosahexaenoic acid; EPA, eicosapentaenoic acid; PUFA, polyunsaturated fatty acid.

221  
222

**Supplemental Table 14.** Current and future trials on niacin and cardiovascular disease (CVD)

| No. | Trial identifier | Trial name                                                                                                                                         | Trial status           | Is diabetes an inclusion criterion? | Is high triglyceride an inclusion criterion? | Intervention                                                      |
|-----|------------------|----------------------------------------------------------------------------------------------------------------------------------------------------|------------------------|-------------------------------------|----------------------------------------------|-------------------------------------------------------------------|
| 1   | NCT04870866      | NAD Supplementation to Prevent Progressive Neurological Disease in Ataxia Telangiectasia                                                           | Active, not recruiting | No                                  | No                                           | Nicotinamide ribonucleoside                                       |
| 2   | NCT04040959      | Nicotinamide Riboside Supplementation for Treating Arterial Stiffness and Elevated Systolic Blood Pressure in Patients With Moderate to Severe CKD | Recruiting             | No                                  | No                                           | Nicotinamide riboside                                             |
| 3   | NCT03821623      | Nicotinamide Riboside for Treating Elevated Systolic Blood Pressure and Arterial Stiffness in Middle-aged and Older Adults                         | Recruiting             | No, diabetes was excluded           | No                                           | Nicotinamide riboside                                             |
| 4   | NCT04528004      | Mechanistic Studies of Nicotinamide Riboside in Human Heart Failure                                                                                | Recruiting             | No                                  | No                                           | Nicotinamide riboside                                             |
| 5   | NCT04112043      | Nicotinamide Riboside as an Enhancer of Exercise Therapy in Hypertensive Older Adults (The NEET Trial)                                             | Recruiting             | No                                  | No                                           | Nicotinamide Riboside                                             |
| 6   | NCT04913805      | Matching Perfusion and Metabolic Activity in HFpEF                                                                                                 | Recruiting             | No                                  | No                                           | Potassium nitrate + propionyl-L-Carnitine + nicotinamide riboside |
| 7   | NCT03743636      | Nicotinamide Riboside With and Without Resveratrol to Improve Functioning in Peripheral Artery Disease                                             | Recruiting             | No                                  | No                                           | Nicotinamide riboside                                             |

|    |             |                                                                                                                      |                    |    |    |                             |
|----|-------------|----------------------------------------------------------------------------------------------------------------------|--------------------|----|----|-----------------------------|
| 8  | NCT04750616 | NAD+ Augmentation in Cardiac Surgery Associated Myocardial Injury Trial                                              | Recruiting         | No | No | Niacinamide                 |
| 9  | NCT04632121 | Oral Nicorandil in ST Elevation Myocardial Infarction Patients Undergoing Primary Percutaneous Coronary Intervention | Not yet recruiting | No | No | Nicorandil                  |
| 10 | NCT04903210 | Nicotinamide Mononucleotide in Hypertensive Patients                                                                 | Not yet recruiting | No | No | Nicotinamide mononucleotide |

223 Abbreviations: CKD, chronic kidney disease; NAD, nicotinamide adenine dinucleotide.

224  
225  
226

**Supplemental Table 15.** Current and future trials on fibrate and cardiovascular disease (CVD)

| No. | Trial identifier | Trial name                                                                                           | Trial status       | Is diabetes an inclusion criterion? | Is high triglyceride an inclusion criterion? | Intervention                                       |
|-----|------------------|------------------------------------------------------------------------------------------------------|--------------------|-------------------------------------|----------------------------------------------|----------------------------------------------------|
| 1   | NCT04140201      | Effect of Lipid Lowering Agents on Diabetic Retinopathy and Cardiovascular Risk of Diabetic Patients | Not yet recruiting | Yes                                 | No                                           | Simvastatin, or fenofibrate, or omega-3 fatty acid |

227
